# Supplementary material for: Atomic resolution view into the structure–function relationships of the human myelin peripheral membrane protein P2
Source: PubMed Central journal article supplement (PMC3919267; doi:10.1107/s1399004713027910), 2013-12-31
Supplement: d-70-00165-sup2.pdf [file d-70-00165-sup2.pdf]

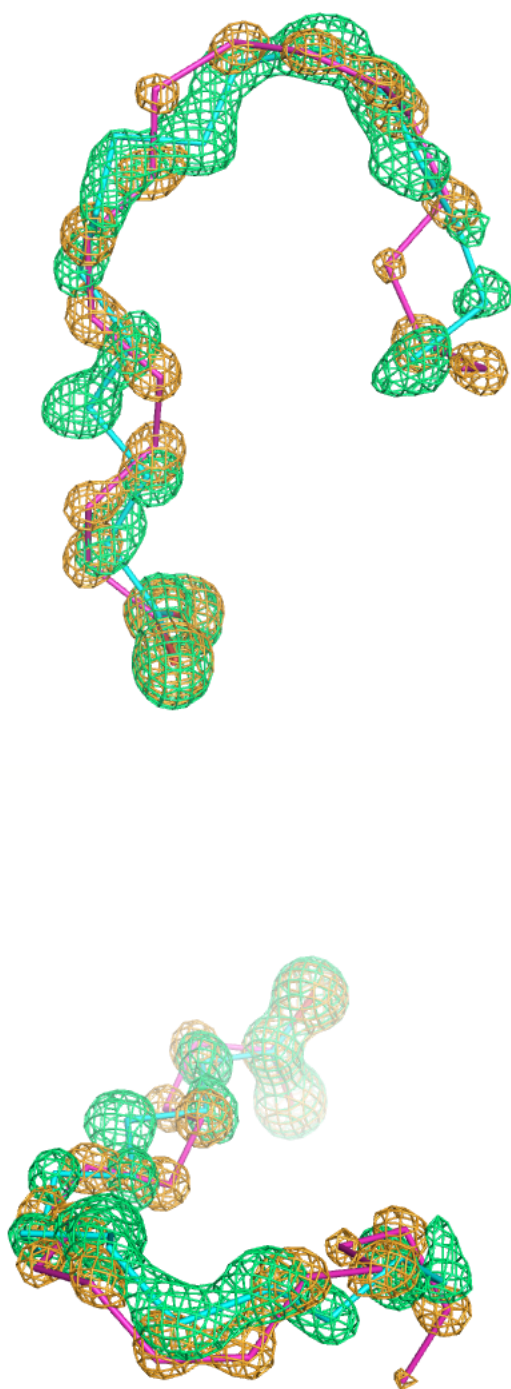

Supplementary Figure 2. Electron density maps calculated without the palmitate molecule. Palmitate is in cyan and *cis*-vaccenate in magenta. The maps are  $2F_o-F_c$  at  $2.5 \sigma$  (orange) and  $F_o-F_c$  at  $5.0 \sigma$  contour level. Top: side view, bottom: view turned approximately  $100^\circ$  about the x-axis to show the position of the double bond in *cis*-vaccenate.
